# Supplementary material for: The Small t Antigen of JC Virus Antagonizes RIG-I-Mediated Innate Immunity by Inhibiting TRIM25’s RNA Binding Ability
Source: PubMed Central journal article supplement (PMC8092259; doi:10.1128/mbio.00620-21), 2021-04-13
Supplement: mBio.00620-21-sf004.pdf [file mBio.00620-21-sf004.pdf]

**A**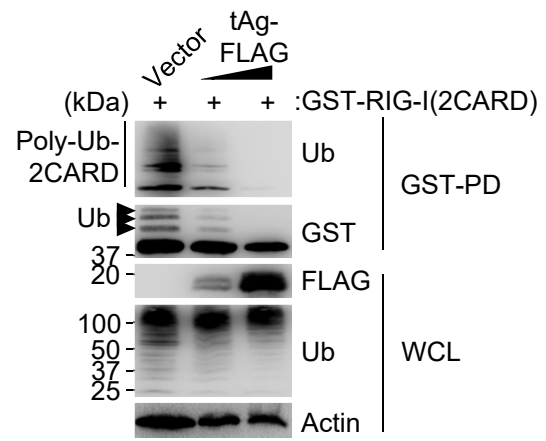**B**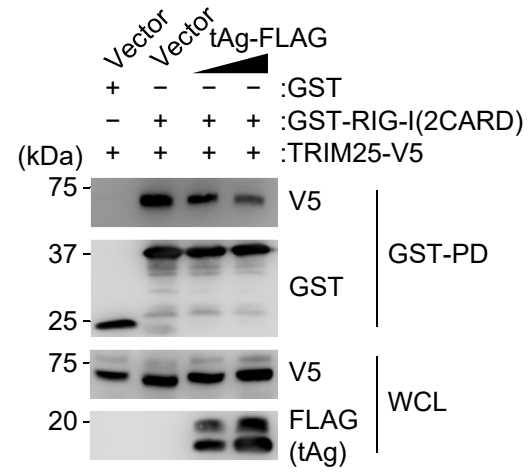

FIGURE S4
